# Supplementary material
Source: MDPI journal article supplement (https://www.mdpi.com/2073-4433/12/3/378)
Supplement: s1 [file s1]

# Supplementary material

**Table S1.** Characteristics of dwellings where the samples were taken.

| Family Members | Type of Housing | Floor Number | Housing Age (years) | Total number of floors | Heating System | Ventilation | Wall Material | Room area (m <sup>2</sup> ) | Room height (m) | Windows in the Room | Window Area (m <sup>2</sup> ) | Window Frames | Type of Frames | Rugs     | Smoking in the Room | Pets | Cleaning Frequency | Cleaning method | Mold on Walls |     |
|----------------|-----------------|--------------|---------------------|------------------------|----------------|-------------|---------------|-----------------------------|-----------------|---------------------|-------------------------------|---------------|----------------|----------|---------------------|------|--------------------|-----------------|---------------|-----|
| 1              | -               | building     | 1                   | 10–50                  | 2              | central     | natural       | brick                       | 15              | 2.5                 | 1                             | 1.0           | aluminum       | casement | no                  | no   | no                 | daily           | washing       | no  |
| 2              | 4               | house        | 0                   | 10–50                  | 2              | central     | natural       | brick                       | 30              | 2.1                 | 2                             | 3.0           | aluminum       | casement | yes                 | no   | no                 | daily           | vacuuming     | no  |
| 3              | 2               | building     | 1                   | 10–50                  | 4              | central     | natural       | brick                       | 30              | 2.4                 | 2                             | 1.5           | aluminum       | casement | yes                 | no   | no                 | weekly          | vacuuming     | no  |
| 4              | 2               | building     | 1                   | 10–50                  | 3              | oil heaters | natural       | brick                       | 20              | 2.5                 | 2                             | 2.0           | aluminum       | sliding  | yes                 | no   | dog                | weekly          | vacuuming     | no  |
| 5              | 1               | building     | 1                   | 10–50                  | 4              | wood        | natural       | brick                       | 30              | 2.1                 | 2                             | 2.7           | aluminum       | sliding  | yes                 | no   | no                 | weekly          | vacuuming     | no  |
| 6              | 4               | building     | 0                   | 10–50                  | 2              | central     | natural       | brick                       | 40              | 2.5                 | 3                             | 2.0           | aluminum       | sliding  | yes                 | no   | no                 | weekly          | vacuuming     | yes |
| 7              | -               | house        | 1                   | >50                    | 2              | central     | natural       | brick and stone             | 40              | 3.0                 | 3                             | 2.0           | aluminum       | casement | no                  | no   | no                 | daily           | vacuuming     | yes |
| 8              | 3               | building     | 1                   | 10–50                  | 4              | central     | natural       | brick                       | 25              | 2.7                 | 2                             | 3.0           | aluminum       | sliding  | yes                 | no   | no                 | weekly          | vacuuming     | no  |
| 9              | 7               | building     | 0                   | 10–50                  | 4              | AC          | AC            | brick and stone             | 50              | 2.8                 | 3                             | 2.5           | PVC            | other    | no                  | no   | no                 | weekly          | vacuuming     | no  |
| 10             | 2               | building     | 3                   | 10–50                  | 3              | electric    | natural       | brick                       | 30              | 2.5                 | 2                             | 3.0           | aluminum       | casement | yes                 | no   | no                 | weekly          | vacuuming     | no  |
| 11             | 2               | building     | 0                   | 10–50                  | 4              | electric    | natural       | brick                       | 12              | 2.7                 | 1                             | 3.0           | aluminum       | other    | no                  | no   | no                 | daily           | vacuuming     | no  |
| 12             | 2               | building     | 1                   | <10                    | 5              | central     | natural       | brick                       | 35              | 2.8                 | 3                             | 3.2           | aluminum       | sliding  | yes                 | no   | no                 | weekly          | vacuuming     | no  |
| 13             | 2               | building     | 1                   | 10–50                  | 3              | central     | natural       | brick                       | 25              | 2.5                 | 2                             | 3.0           | aluminum       | sliding  | yes                 | no   | no                 | weekly          | vacuuming     | yes |
| 14             | 3               | house        | 0                   | 10–50                  | 1              | central     | natural       | brick and stone             | 20              | 2.5                 | 3                             | 1.0           | aluminum       | sliding  | no                  | no   | 3 dogs             | weekly          | vacuuming     | yes |
| 15             | 2               | house        | 1                   | >50                    | 2              | wood        | natural       | stone                       | 30              | 2.5                 | 1                             | 1.0           | aluminum       | casement | no                  | no   | no                 | weekly          | vacuuming     | no  |
| 16             | 4               | house        | 0                   | 10–50                  | 3              | central     | natural       | brick                       | 40              | 2.8                 | 3                             | 3.0           | aluminum       | sliding  | yes                 | no   | no                 | weekly          | vacuuming     | yes |
| 17             | 3               | building     | -1                  | <10                    | 5              | central     | natural       | brick                       | 30              | 2.5                 | 2                             | 3.0           | aluminum       | sliding  | yes                 | no   | no                 | weekly          | vacuuming     | no  |
| 18             | 2               | building     | 0                   | 10–50                  | 3              | pellets     | natural       | brick                       | 35              | 2.9                 | 2                             | 3.0           | aluminum       | casement | no                  | no   | no                 | weekly          | vacuuming     | no  |
| 19             | 3               | building     | 0                   | 10–50                  | 4              | AC          | natural       | brick                       | 25              | 2.8                 | 2                             | 3.0           | aluminum       | sliding  | yes                 | yes  | 2 dogs             | daily           | vacuuming     | no  |
| 20             | 3               | house        | 0                   | 10–50                  | 3              | pellets     | natural       | brick                       | 40              | 2.8                 | 2                             | 3.0           | aluminum       | casement | no                  | no   | no                 | weekly          | vacuuming     | no  |
| 21             | 4               | building     | 1                   | 10–50                  | 2              | central     | natural       | brick                       | 31              | 2.8                 | 2                             | 2.0           | aluminum       | sliding  | yes                 | no   | cat                | weekly          | vacuuming     | no  |
| 22             | 3               | building     | 1                   | <10                    | 2              | central     | natural       | brick                       | 32              | 2.7                 | 2                             | 3.0           | aluminum       | casement | no                  | no   | no                 | weekly          | vacuuming     | no  |
| 23             | 5               | building     | 1                   | 10–50                  | 2              | central     | natural       | brick                       | 40              | 2.3                 | 2                             | 4.0           | aluminum       | casement | yes                 | no   | no                 | weekly          | vacuuming     | no  |
| 24             | 4               | building     | 1                   | 10–50                  | 4              | wood        | natural       | brick and stone             | 25              | 2.8                 | 3                             | 3.0           | PVC            | other    | yes                 | no   | dogs               | daily           | vacuuming     | no  |
| 25             | 3               | building     | -1                  | 10–50                  | 6              | electric    | natural       | brick                       | 10              | 2.5                 | 1                             | 1.0           | aluminum       | sliding  | no                  | no   | no                 | weekly          | vacuuming     | no  |

---

|    |    |          |   |       |   |             |         |       |    |     |   |     |          |         |     |     |     |        |           |    |
|----|----|----------|---|-------|---|-------------|---------|-------|----|-----|---|-----|----------|---------|-----|-----|-----|--------|-----------|----|
| 26 | 4  | building | 3 | <10   | 3 | central     | natural | brick | 30 | 3.0 | 2 | 4.0 | aluminum | sliding | yes | yes | no  | weekly | vacuuming | no |
| 27 | 20 | building | 0 | 10–50 | 1 | central     | natural | brick | 50 | 2.5 | 1 | 3.0 | aluminum | sliding | no  | no  | no  | daily  | vacuuming | no |
| 28 | 10 | building | 0 | >150  | 1 | central     | natural | stone | 30 | 3.0 | 1 | 3.0 | PVC      | sliding | no  | no  | no  | daily  | vacuuming | no |
| 29 | 3  | house    | 0 | 10–50 | 2 | wood        | natural | brick | 15 | 2.5 | 1 | 1.5 | aluminum | sliding | yes | no  | no  | weekly | vacuuming | no |
| 30 | 2  | building | 1 | 10–50 | 3 | oil heaters | natural | brick | 20 | 2.5 | 1 | 4.0 | aluminum | sliding | yes | no  | dog | weekly | vacuuming | no |

---

AC—Air Conditioner; PVC—Polyvinyl Chloride.
